# Supplementary material for: A xylenol orange-based pH-sensitive sensor array for identification of bacteria and differentiation of probiotic drinks
Source: Royal Society of Chemistry journal article supplement (doi:10.1039/d4ay01982b), 2024-12-10
Supplement: d4ay01982b5.pdf [file d4ay01982b5.pdf]

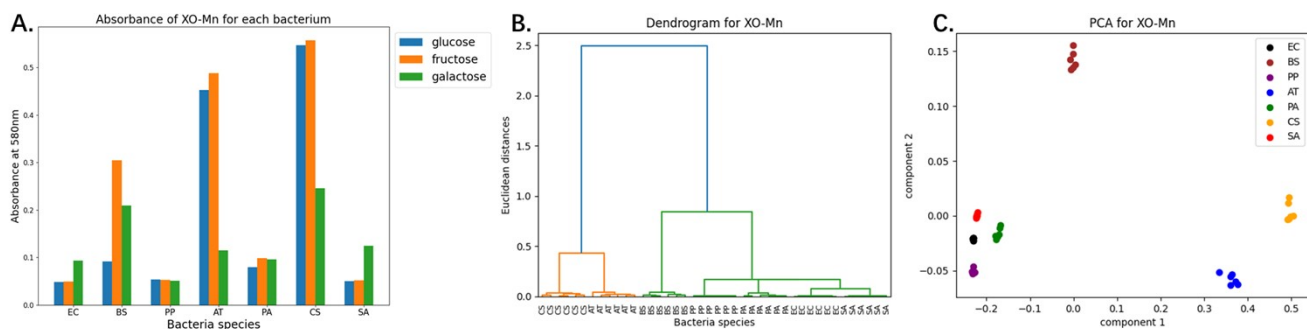

Fig S1. Identification results of XO and  $Mn^{2+}$  combination to 7 bacteria species. (A) Histogram of the average value of absorbance of each sugar-bacteria incubation. (B) HCA results for identification. (C) PCA results for identification.

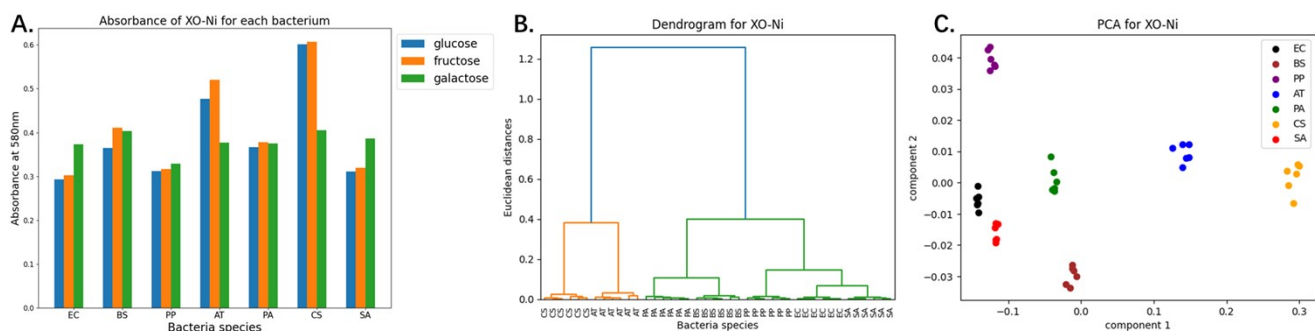

Fig S2. Identification results of XO and  $Ni^{2+}$  combination to 7 bacteria species. (A) Histogram of the average value of absorbance of each sugar-bacteria incubation. (B) HCA results for identification. (C) PCA results for identification.

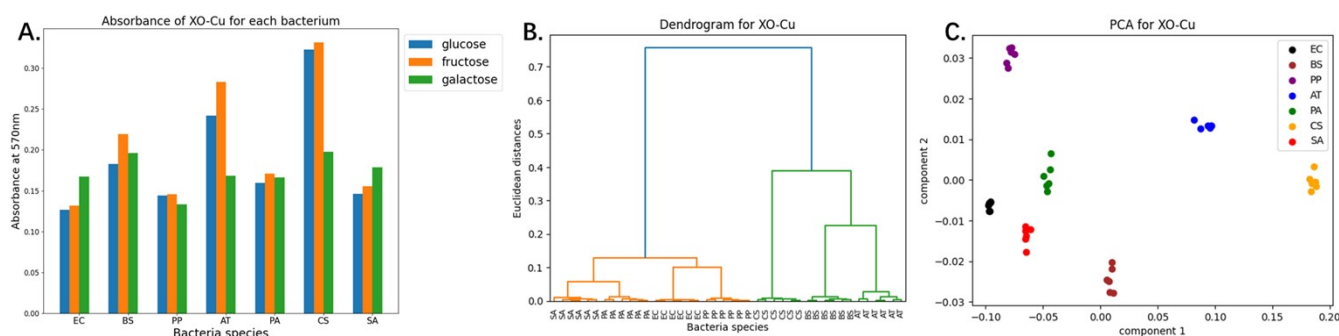

Fig S3. Identification results of XO and  $Cu^{2+}$  combination to 7 bacteria species. (A) Histogram of the average value of absorbance of each sugar-bacteria incubation. (B) HCA results for identification. (C) PCA results for identification.

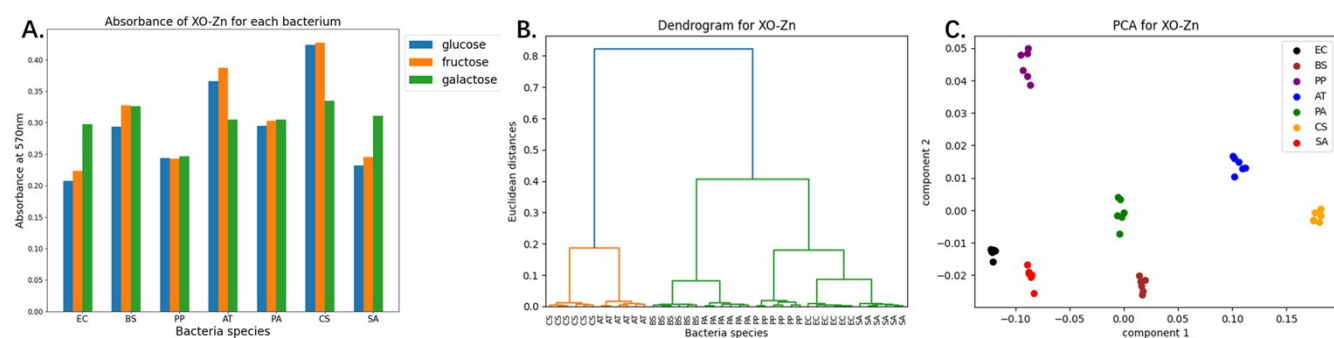

Fig S4. Identification results of XO and  $\text{Zn}^{2+}$  combination to 7 bacteria species. (A) Histogram of the average value of absorbance of each sugar-bacteria incubation. (B) HCA results for identification. (C) PCA results for identification.
